# Supplementary material for: Performance evaluation of commercial library construction kits for PCR-based targeted sequencing using a unique molecular identifier
Source: BMC Genomics. 2019 Mar 14;20:216. doi: 10.1186/s12864-019-5583-7 (PMC6416880; doi:10.1186/s12864-019-5583-7)
Supplement: Supplementary file 1 — Characteristics of the five kits and QC metrics of the sequencing data. (XLSX 10 kb) [file 12864_2019_5583_MOESM1_ESM.xlsx]

## Sheet: Sheet1
	Vendor	Product name	Target region (bp)	Enrichment technique	Length of UMI sequence	Average of reads (total)	Average of generated depth (×)	Usage of UMI	Average of duplicate (%)	Average of On_target (%)	Average of Target_depth (×)
	Nugen	Ovation® Custom	46692	Anchored multiplex PCR	6	7068426	15138	N	91.57	36.77	468
		Cancer Panel						Y	84.2	39.4	940
	ArcherDX	Reveal ctDNA™	15090		8	6495984	43048	N	94.21	17.14	424
		28 Kit						Y	88.3	37.44	1889
	Qiagen	Human Comprehensive Cancer Panel	920217		12	74982433	8148	N	85.45	44.02	520
								Y	46.48	58.25	2540
		Human Tumor	33057		12	6352171	19216	N	89.1	35.94	741
		Actionable Mutations						Y	42.92	61.75	6750
	NEB	NEBNext Direct®	48129	Multiplex PCR	12	6423782	13347	N	81.44	9.6	216
		Cancer HotSpot Panel		combined bait-target hybrids				Y	76.13	25.12	737
