# Supplementary material for: Performance evaluation of commercial library construction kits for PCR-based targeted sequencing using a unique molecular identifier
Source: BMC Genomics. 2019 Mar 14;20:216. doi: 10.1186/s12864-019-5583-7 (PMC6416880; doi:10.1186/s12864-019-5583-7)
Supplement: Supplementary file 8 — Variants in Horizon cfDNA reference material. (XLSX 9 kb) [file 12864_2019_5583_MOESM8_ESM.xlsx]

## Sheet: Sheet1
	Gene	Variants	Chr	Position	REF	ALT	Expected allele frequency
							HD777	HD778	HD779
	EGFR	L858R	chr7	55259515	T	G	0.05	0.01	0.001
	EGFR	ΔE746 - A750	chr7	55242464	AGGAATTAAGAGAAGC	A	0.05	0.01	0.001
	EGFR	T790M	chr7	55249071	C	T	0.05	0.01	0.001
	EGFR	V769 - D770insASV	chr7	55248998	A	ATGGCCAGCG	0.05	0.01	0.001
	KRAS	G12D	chr12	25398284	C	T	0.063	0.013	0.0013
	NRAS	Q61K	chr1	115256530	G	T	0.063	0.013	0.0013
	NRAS	A59T	chr1	115256536	C	T	0.063	0.013	0.0013
	PIK3CA	E545K	chr3	178936091	G	A	0.063	0.013	0.0013
