# Supplementary material for: Performance evaluation of commercial library construction kits for PCR-based targeted sequencing using a unique molecular identifier
Source: BMC Genomics. 2019 Mar 14;20:216. doi: 10.1186/s12864-019-5583-7 (PMC6416880; doi:10.1186/s12864-019-5583-7)
Supplement: Supplementary file 9 — Detection of variants with each detection method depending on various input DNA amounts. Success and failure of variant detection are indicated by ‘O’ and ‘X,’ respectively. AF, allele frequency; UMI, unique molecular identifier. (XLSX 10 kb) [file 12864_2019_5583_MOESM9_ESM.xlsx]

## Sheet: Sheet1
				Qiagen data center analysis				LowFreq & Pindel
	Gene	Variant	Expected	with UMI				with UMI				without UMI
			AF	6.25	12.5	25	50	6.25	12.5	25	50	6.25	12.5	25	50
	EGFR	L858R	0.05	O	O	O	O	O	O	O	O	O	O	O	O
	EGFR	ΔE746 - A750	0.05	O	O	O	O	O	O	O	O	O	O	O	O
	EGFR	T790M	0.05	O	O	O	O	O	O	O	O	O	O	O	O
	EGFR	V769 - D770insASV	0.05	O	O	O	O	O	O	O	O	O	O	O	O
	KRAS	G12D	0.063	O	O	O	O	O	O	O	O	O	O	O	O
	NRAS	Q61K	0.063	O	O	O	O	O	O	O	O	O	O	O	O
	NRAS	A59T	0.063	O	O	O	O	O	O	O	O	O	O	O	O
	PIK3CA	E545K	0.063	O	O	O	O	O	O	O	O	O	O	O	O
	EGFR	L858R	0.01	O	O	O	O	O	O	O	O	X	O	O	O
	EGFR	ΔE746 - A750	0.01	X	X	O	O	O	O	O	O	O	O	O	O
	EGFR	T790M	0.01	O	O	O	O	X	O	O	O	X	O	O	O
	EGFR	V769 - D770insASV	0.01	X	X	O	O	O	O	O	O	O	O	O	O
	KRAS	G12D	0.013	O	O	O	O	O	O	O	O	O	O	O	O
	NRAS	Q61K	0.013	O	O	O	O	O	O	O	O	O	X	X	O
	NRAS	A59T	0.013	O	O	O	O	O	O	O	O	O	O	O	O
	PIK3CA	E545K	0.013	O	O	O	O	O	O	O	O	O	X	O	O
