# Supplementary material for: Performance evaluation of commercial library construction kits for PCR-based targeted sequencing using a unique molecular identifier
Source: BMC Genomics. 2019 Mar 14;20:216. doi: 10.1186/s12864-019-5583-7 (PMC6416880; doi:10.1186/s12864-019-5583-7)
Supplement: Supplementary file 10 — Summary of false negative calls when using various input DNA amounts. Listed positions are not detected in each condition. (XLSX 20 kb) [file 12864_2019_5583_MOESM10_ESM.xlsx]

## Sheet: Qiagen data analysis center
			count	False Positive call (result from Qiagen data analysis center)
	HD777 (5-6.3%)	50ng	0	-	-	-	-	-
		25ng	1	-	-	-	-	chr17:7572962 (GT>G, 0.005)
		12.5ng	3	-	-	chr12:25380227 (G>GCCCCC, 0.01)	chr12:25380231 (T>G, 0.01)	chr17:7577539 (G>T, 0.01)
		6.25ng	5	chr1:115258748 (C>T, 0.007)	chr4:55153546 (G>A, 0.004)	chr12:25380227 (G>GCCCCC, 0.01)	chr12:25380231 (T>G, 0.01)	chr17:7579359 (G>A, 0.006)
	HD778 (1-1.3%)	50ng	0	-	-	-	-	-	-	-
		25ng	0	-	-	-	-	-	-	-
		12.5ng	2	-	-	-	-	chr12:25380227 (G>GCCCCC, 0.009)	chr12:25380231 (T>G, 0.01)	-
		6.25ng	7	chr2:29443632 (C>T, 0.004)	chr3:178928318 (C>T, 0.004)	chr3:178936092 (A>C, 0.009)	chr3:178938826 (T>C, 0.014)	chr12:25380227 (G>GCCCCC, 0.01)	chr12:25380231 (T>G, 0.01)	chr17:37868218 (C>T, 0.006)
								Genomic position of each variant based on hg19
								(Ref allele / Alt allele, VAF)

## Sheet: LoFreq
			count	False Positive call (Lofreq after deduplication with UMI)					count	False Positive call (Lofreq after deduplication without UMI)
	HD777 (5-6.3%)	50ng	2	chr6:152129019 (G->T (0.0282))	chr7:55214407 (T->A (0.0111))	-	-		13	chr17:37868694 (T->C (0.011))	chr3:178922303 (A->G (0.011))	chr4:55161384 T->C (0.013))	chr6:152129019 (G->T (0.026))	chr7:140477752 (A->G (0.017))	chr12:25362799 (T->C (0.014))	chr12:56492656 (T->C (0.011))	chr17:7577541 (T->G (0.013))	chr17:7578160 (C->T (0.015))	chr2:29443624 (A->G (0.0102))	chr4:55133773 (T->C (0.013))	chr7:116423473 (A->T (0.016))	chr7:55238082 (T->C (0.011))
		25ng	3	chr3:178921419 (T->A (0.02759))	chr6:152129019 (G->T (0.0217))	chr7:55214407 (T->A (0.0108))	-		20	chr17:37863398 (A->G (0.012))	chr17:37876105 (G->A (0.012))	chr17:7572967 (T->C (0.0103))	chr17:7572971 (G->A (0.0104))	chr2:29443620 (C->T (0.0114))	chr2:29448406 (C->T (0.012))	chr2:29448408 (G->A (0.012))	chr2:29449866 (T->C (0.015))	chr3:178943726 (T->C (0.013))	chr4:55130059 (T->C (0.011))	chr4:55161344 (T->C (0.012))	chr7:55214362 (A->G (0.013))	chr10:43609099 (T->C (0.013))	chr17:7572976 (G->A (0.0121))	chr17:7579281 (T->C (0.019))	chr2:29436898 (T->C (0.013))	chr2:29443617 (C->T (0.0133))	chr6:152129019 (G->T (0.057))	chr7:140481508 (T->C (0.019))	chr7:55210104 (A->G (0.012))
		12.5ng	1	chr6:152129019 (G->T (0.0252))	-	-	-		21	chr10:43617448 (A->G (0.013))	chr17:37876031 (C->T (0.013))	chr17:7572975 (G->A (0.0132))	chr17:7577507 (T->C (0.015))	chr2:29445161 (T->C (0.02))	chr2:29606666 (T->C (0.012))	chr3:12645747 (T->C (0.017))	chr3:178943756 (G->A (0.011))	chr4:55604647 (A->G (0.012))	chr6:152129019 (G->T (0.018))	chr12:25360224 (A->G (0.019))	chr12:56481914 (A->G (0.011))	chr17:7574042 (A->G (0.011))	chr3:12626100 (A->G (0.013))	chr3:178927497 (T->C (0.011))	chr4:55127403 (A->G (0.011))	chr4:55597469 (T->C (0.014))	chr7:140453097 (A->G (0.035))	chr7:140453132 (T->C (0.0102))	chr7:55214362 (A->G (0.012))	chr7:55268907 (T->C (0.011))
		6.25ng	3	chr3:178938749 (T->A (0.0361))	chr3:178937544 (A->G (0.014))	chr6:152129019 (G->T (0.0158))	-		30	chr10:43613806 (T->C (0.018))	chr10:43617373 (T->C (0.012))	chr12:25380272 (C->T (0.0113))	chr17:37882094 (A->G (0.013))	chr2:29443624 (A->G (0.0156))	chr2:29448410 (T->C (0.021))	chr2:29449836 (A->G (0.011))	chr3:178941882 (T->C (0.012))	chr3:178942607 (A->G (0.012))	chr7:140481508 (T->C (0.019))	chr7:140481514 (A->G (0.015))	chr7:140500179 (G->A (0.011))	chr7:55214362 (A->G (0.016))	chr7:55220289 (T->C (0.012))	chr1:115252384 (A->G (0.028))	chr10:43609942 (G->A (0.011))	chr10:43617446 (A->G (0.011))	chr12:25380165 (C->T (0.014))	chr12:56478860 (C->T (0.0127))	chr15:90631825 (G->A (0.011))	chr17:37866401 (T->C (0.012))	chr17:37882023 (A->G (0.0156))	chr2:29448403 (T->C (0.019))	chr2:29448404 (G->A (0.02))	chr3:178916715 (A->G (0.012))	chr3:178948016 (T->C (0.017))	chr3:178952060 (T->C (0.015))	chr4:55592138 (A->G (0.015))	chr7:55214367 (C->T (0.013))	chr7:55214368 (G->A (0.011))
	HD778 (1-1.3%)	50ng	1	chr3:178921419 (T->A (0.02234))	-	-	-		10	chr17:7572971 (G->A (0.0103))	chr3:178936932 (C->T (0.011))	chr3:178941854 (T->C (0.012))	chr7:55214368 (G->A (0.012))	chr10:43615631 (T->C (0.011))	chr2:29436874 (A->G (0.014))	chr2:29445236 (A->G (0.011))	chr4:55144188 (C->T (0.013))	chr4:55595619 (T->C (0.0105))	chr6:152419956 (G->A (0.011))
		25ng	0	-	-	-	-		21	chr10:43615623 (A->G (0.011))	chr12:25378694 (T->C (0.012))	chr12:56492652 (G->A (0.011))	chr17:37866758 (T->C (0.011))	chr17:37876105 (G->A (0.012))	chr17:37881667 (G->A (0.012))	chr17:7572971 (G->A (0.0109))	chr17:7578191 (A->G (0.017))	chr17:7578200 (C->T (0.011))	chr2:29448406 (C->T (0.011))	chr2:29448416 (T->C (0.015))	chr2:29606666 (T->C (0.012))	chr3:138665153 (A->G (0.011))	chr4:55592013 (T->C (0.011))	chr7:55214368 (G->A (0.012))	chr12:25360249 (A->G (0.016))	chr12:25398319 (T->C (0.011))	chr2:29448404 (G->A (0.011))	chr4:55130074 (T->C (0.014))	chr4:55597504 (A->G (0.012))	chr4:55604605 (A->G (0.019))
		12.5ng	0	-	-	-	-		31	chr10:43609956 (G->A (0.013))	chr12:25378704 (T->C (0.011))	chr12:56492662 (A->G (0.013))	chr15:90631967 (T->C (0.017))	chr17:37881016 (T->C (0.0115))	chr17:37883548 (A->G (0.013))	chr17:7572967 (T->C (0.0122))	chr17:7572971 (G->A (0.0107))	chr2:29443624 (A->G (0.0105))	chr2:29448404 (G->A (0.012))	chr3:12626081 (G->A (0.017))	chr3:12626110 (T->C (0.013))	chr3:178927497 (T->C (0.012))	chr3:178947255 (T->C (0.017))	chr4:55131101 (A->G (0.0102))	chr4:55139785 (T->C (0.011))	chr4:55139806 (T->C (0.011))	chr4:55597516 (A->G (0.011))	chr7:55214362 (A->G (0.011))	chr10:43615638 (T->C (0.013))	chr12:25380272 (C->T (0.0142))	chr17:37876075 (A->G (0.011))	chr17:7579318 (A->G (0.0125))	chr2:29432656 (A->G (0.012))	chr2:29606666 (T->C (0.012))	chr3:178916890 (C->T (0.0132))	chr3:178919141 (T->C (0.011))	chr3:178943740 (T->C (0.013))	chr3:178952154 (A->G (0.012))	chr4:55592155 (T->C (0.012))	chr7:116423481 (G->A (0.016))
		6.25ng	1	chr7:55241712 (C->T (0.0108))	-	-	-		43	chr10:43609920 (A->G (0.015))	chr10:43609952 (G->A (0.012))	chr12:25362815 (G->A (0.011))	chr17:37855832 (A->G (0.011))	chr17:37868298 (G->A (0.016))	chr17:37876105 (G->A (0.018))	chr17:7572971 (G->A (0.0101))	chr17:7572976 (G->A (0.0149))	chr17:7574095 (T->C (0.017))	chr17:7577507 (T->C (0.012))	chr2:29436898 (T->C (0.013))	chr3:12645757 (A->G (0.026))	chr3:178936938 (A->G (0.02))	chr3:178942014 (T->C (0.02))	chr4:55127457 (T->C (0.013))	chr4:55599416 (A->G (0.012))	chr4:55603320 (T->A (0.02))	chr7:55242411 (A->G (0.011))	chr10:43609914 (A->G (0.013))	chr12:25378677 (T->C (0.012))	chr17:37868125 (T->C (0.02))	chr17:37876095 (T->A (0.011))	chr17:37881308 (A->G (0.011))	chr17:37881584 (C->T (0.012))	chr17:37881924 (C->T (0.014))	chr17:7572967 (T->C (0.0163))	chr17:7577541 (T->G (0.014))	chr2:29443624 (A->G (0.0111))	chr2:29446352 (T->C (0.0135))	chr2:29448403 (T->C (0.023))	chr2:29448406 (C->T (0.017))	chr2:29448408 (G->A (0.013))	chr3:12645725 (T->C (0.014))	chr3:178916602 (A->G (0.013))	chr3:178919144 (A->G (0.011))	chr3:178921427 (A->G (0.013))	chr3:178948047 (A->G (0.013))	chr4:55144558 (T->C (0.011))	chr4:55589802 (T->C (0.014))	chr4:55592143 (T->C (0.011))
					filtered by VAF ( > 0.01)
					Genomic position of each variant based on hg19
					(Ref allele / Alt allele (VAF))
[truncated: 3 more columns]
