# Supplementary material for: Performance evaluation of commercial library construction kits for PCR-based targeted sequencing using a unique molecular identifier
Source: BMC Genomics. 2019 Mar 14;20:216. doi: 10.1186/s12864-019-5583-7 (PMC6416880; doi:10.1186/s12864-019-5583-7)
Supplement: Supplementary file 12 — List of HapMap cell lines used as the input DNA sources for performance evaluations of library construction kits. (XLSX 9 kb) [file 12864_2019_5583_MOESM12_ESM.xlsx]

## Sheet: Sheet1
	HapMap cell line	Ethnicity	Cell Type	Description
	NA07014	Caucasian	B-Lymphocyte	INTERNATIONAL HAPMAP PROJECT
	NA10840	Caucasian	B-Lymphocyte	INTERNATIONAL HAPMAP PROJECT
	NA18595	HAN CHINESE	B-Lymphocyte	INTERNATIONAL HAPMAP PROJECT
	NA18957	JAPANESE	B-Lymphocyte	INTERNATIONAL HAPMAP PROJECT
	NA18488	YORUBA	B-Lymphocyte	INTERNATIONAL HAPMAP PROJECT
	NA18511	YORUBA	B-Lymphocyte	INTERNATIONAL HAPMAP PROJECT
	NA18867	YORUBA	B-Lymphocyte	INTERNATIONAL HAPMAP PROJECT
	NA18924	YORUBA	B-Lymphocyte	INTERNATIONAL HAPMAP PROJECT
	NA19108	YORUBA	B-Lymphocyte	INTERNATIONAL HAPMAP PROJECT
	NA19114	YORUBA	B-Lymphocyte	INTERNATIONAL HAPMAP PROJECT
